# Supplementary material for: Function of ankle ligaments for subtalar and talocrural joint stability during an inversion movement – an in vitro study
Source: J Foot Ankle Res. 2019 Mar 18;12:16. doi: 10.1186/s13047-019-0330-5 (PMC6421682; doi:10.1186/s13047-019-0330-5)
Supplement: Supplementary file 1 — Supplementary data 1. (XLSX 9 kb) [file 13047_2019_330_MOESM1_ESM.xlsx]

## Sheet: Sheet1
Supplementary data 1 Absolute values (median values, mean absolute deviation around the median, n = 8) of three variables in four dissection sessions are shown in three ankle sagittal plane angle conditions.
Parameter	Calcaneus vs. Fibula				Talus vs. Fibula				Calcaneus vs.Talus
Session/Condition	Intact	1 Lig.cut	2 Lig.cut	3 Lig.cut	Intact	1 Lig.cut	2 Lig.cut	3 Lig.cut	Intact	1 Lig.cut	2Lig.cut	3 Lig.cut
Dorsiflexion	5.2±2.4	5.1±1.9	6.8±15.5	11.1±9.2	2.5±1.9	2.5±2.9	2.4±6.8	4.6±8.7	2.7±2.5	3.1±-2.2	5.3±7.2	6.8±2.5
Neutral position	10.5±-5.6	10.4±0.84	15.8±2.4	17.7±7.3	4.4±-0.2	3.8±1.1	6.3±17.4	8.4±27.6	5.7±1.5	7.8±-6.1	7.7±5.1	8.8±7.7
Plantarflexion	13.7±-8.9	12.9±-7.3	16.7±15.5	21.4±-3.3	4.3±3.6	3.5±4.9	8.6±26.4	7.9±51.2	8.4±1.8	8.7±-2.4	8.5±8.3	7.6±13.9
