# Supplementary material for: Function of ankle ligaments for subtalar and talocrural joint stability during an inversion movement – an in vitro study
Source: J Foot Ankle Res. 2019 Mar 18;12:16. doi: 10.1186/s13047-019-0330-5 (PMC6421682; doi:10.1186/s13047-019-0330-5)
Supplement: Supplementary file 2 — Supplementary data 2. (XLSX 11 kb) [file 13047_2019_330_MOESM2_ESM.xlsx]

## Sheet: Sheet1
Supplementary data 2 Absolute values from all subjects of three variables in four dissection sessions are shown in three ankle sagittal plane angle conditions.
Parameter		Calcaneus vs. Fibula				Talus vs. Fibula				Talus vs. Calcaneus
Session/Condition	Speicmen seral number	Intact	1 Lig.cut	2 Lig.cut	3 Lig.cut	Intact	1 Lig.cut	2 Lig.cut	3 Lig.cut	Intact	1 Lig.cut	2Lig.cut	3 Lig.cut
Dorsiflexion	3116l	4.5	5.1	6.3	7.7	1.4	2.1	2.1	3.1	3.2	3.1	4.4	4.8
	3116r	5.2	4.2	9.7	10.9	3.1	3.1	3.4	5.2	2.8	1.4	7.2	6.4
	3915l	5.2	6.5	6.6	13.4	3.1	3.4	1.9	5.2	2.7	3.7	7.4	9.9
	3915r	7.9	5.3	6.5	8.9	5.4	2.9	2.4	4.1	2.6	2.8	4.5	5.1
	5015l	6.9	4.9	7.9	7.9	2.6	2.5	3.2	3.4	4.8	4.1	5.9	5.8
	5215r	4.5	5.1	19.3	24.9	2.3	1.8	8.3	16.1	1.9	3.3	11.1	9.1
	6915l	4.6	2.9	6.8	11.2	2.2	0.9	2.4	3.3	2.5	2.1	4.7	8.5
	6915r	5.2	8.3	6.9	12.6	1.8	6.5	2.4	5.4	3.6	2.1	4.6	7.1
Neutral position	3116l	5.6	9.1	15.1	16.7	0.5	2.1	4.7	6.9	5.8	7.6	10.9	10.4
	3116r	10.5	13.9	16.6	18.1	4.7	5.6	8.2	10.5	6.7	9.3	9.2	8.3
	3915l	10.4	12.4	18.8	19.6	5.8	5.3	7.7	4.2	5.6	8.1	12.2	17.2
	3915r	12.2	9.8	18.9	18.2	4.2	3.8	4.3	4.4	9.1	6.8	16.3	15.1
	5015l	7.2	10.7	32.7	41.1	2.1	2.4	26.7	35.7	5.1	8.1	6.3	6.1
	5215r	10.9	11.3	11.1	17.3	4.1	3.7	6.5	9.8	7.4	7.9	5.2	8.1
	6915l	11.9	10.1	8.8	10.3	8.2	6.1	6.1	19.2	3.8	4.2	3.2	9.3
	6915r	9.3	6.4	6.9	7.5	5.7	2.2	3.5	3.7	3.7	4.2	3.4	3.9
Plantarflexion	3116l	8.1	8.1	12.2	12.7	3.1	3.1	6.3	5.4	5.6	5.7	6.5	7.9
	3116r	10.9	12.7	19.1	17.6	5.1	5.7	10.8	10.4	6.5	7.8	8.9	7.8
	3915l	13.3	12.1	14.5	21.5	4.1	3.1	4.4	5.1	9.9	9.9	11.4	18.2
	3915r	15.7	13.1	20.1	22.6	4.1	2.8	3.5	5.2	13.2	11.3	17.9	18.8
	5015l	14.1	13.1	43.5	40.4	4.4	3.9	33.8	34.2	9.5	9.1	10.2	6.9
	5215r	15.2	13.8	19.2	26.1	4.8	5.9	12.1	21.9	11.2	8.7	7.9	5.4
	6915l	16.6	14.6	12.2	21.4	10.5	6.3	20.8	28.7	7.3	8.7	8.1	7.5
	6915r	6.7	8.2	8.7	5.9	1.6	2.2	3.3	3.6	5.6	6.1	5.6	2.5
